# Supplementary material for: Phenotyping of Sleep‐Disordered Breathing in Patients With Chronic Heart Failure With Reduced Ejection Fraction—the SchlaHF Registry
Source: PubMed Central journal article supplement — J Am Heart Assoc. 2017 Nov 29;6(12):e005899. doi: 10.1161/JAHA.116.005899 (PMC5778994; doi:10.1161/jaha.116.005899), 2017-11-29
Supplement: JAH3-6-e005899-s001.pdf [file JAH3-6-e005899-s001.pdf]

# **Supplemental Material**

**Table S1.** Patient demographic data and characteristics at baseline based on type of sleep-disordered breathing and sex

|                                                   | OSA     |          | OSA-CSA |          | CSA     |          |
|---------------------------------------------------|---------|----------|---------|----------|---------|----------|
|                                                   | Female  | Male     | Female  | Male     | Female  | Male     |
| N (%)                                             | 94 (46) | 358 (26) | 67 (33) | 557 (41) | 43 (21) | 438 (32) |
| Age, years                                        | 68±10   | 65±11    | 70±8    | 69±11    | 68±12   | 69±10    |
| Body mass index, kg/m <sup>2</sup>                | 33±6    | 31±6     | 29±6    | 29±5     | 29±5    | 28±4     |
| LVEF, %                                           | 36±8    | 35±8     | 34±8    | 34±8     | 32±8    | 32±8     |
| NYHA class III+IV                                 | 76 (81) | 258 (72) | 50 (75) | 372 (67) | 34 (79) | 322 (74) |
| Ischemic cardiomyopathy, n (%)                    | 28 (30) | 198 (55) | 33 (49) | 310 (56) | 20 (47) | 259 (59) |
| Atrial fibrillation, n (%)                        | 24 (26) | 79 (22)  | 22 (33) | 181 (32) | 16 (37) | 158 (36) |
| <b>Medication, n (%)</b>                          |         |          |         |          |         |          |
| ACE inhibitors and/or ARBs                        | 78 (83) | 316 (88) | 60 (90) | 512 (92) | 40 (93) | 391 (89) |
| β-blockers                                        | 73 (78) | 318 (89) | 62 (93) | 509 (91) | 38 (88) | 398 (91) |
| Diuretics                                         | 75 (80) | 274 (77) | 50 (75) | 469 (84) | 32 (74) | 366 (84) |
| Digitalis                                         | 12 (13) | 52 (15)  | 15 (22) | 111 (20) | 10 (23) | 91 (21)  |
| Aldosterone antagonists                           | 37 (39) | 158 (44) | 33 (49) | 249 (45) | 22 (51) | 215 (49) |
| <b>Polysomnography</b>                            |         |          |         |          |         |          |
| AHI, /h                                           | 33±17   | 38±20    | 34±16   | 36±16    | 34±14   | 38±15    |
| cAHI, /h                                          | 2±3     | 2±3      | 18±11   | 20±11    | 32±14   | 35±14    |
| AI, /h                                            | 14±14   | 20±19    | 14±12   | 22±16    | 19±15   | 24±18    |
| %cAHI/AHI                                         | 5±6     | 6±6      | 53±16   | 55±18    | 92±7    | 92±6     |
| Mean SaO <sub>2</sub> , %*                        | 92±3    | 92±3     | 92±2    | 93±2     | 93±2    | 93±3     |
| Minimum SaO <sub>2</sub> , %*                     | 77±9    | 78±9     | 80±7    | 80±8     | 81±6    | 81±7     |
| Time with SaO <sub>2</sub> <90%, min <sup>†</sup> | 64±83   | 61±77    | 57±77   | 50±68    | 52±54   | 50±71    |
| Awake pCO <sub>2</sub> , mmHg                     | 40±4    | 39±4     | 37±4    | 37±4     | 37±4    | 36±5     |

Values are mean ± standard deviation, or number of patients (percentage).

\*Values missing for 1 patient with OSA; †Values missing for 4 patients with OSA, 4 with OSA-CSA and 4 with CSA.

ACE indicates angiotensin converting enzyme; AHI, apnea-hypopnea-index; AI, apnea index; ARB, angiotensin receptor blocker; cAHI, central AHI; CSA, central sleep apnea (defined as %cAHI/AHI  $\geq$ 80.0%); LVEF, left ventricular ejection fraction; NYHA, New York Heart Association; OSA, obstructive sleep apnea (defined as %cAHI/AHI 0-19.9%); OSA-CSA, obstructive sleep apnea + central sleep apnea (defined as %cAHI/AHI  $\geq$ 20.0% and <80%); pCO<sub>2</sub>, partial pressure of carbon dioxide; SaO<sub>2</sub>, oxygen saturation.

**Table S2.** Patient demographic data and characteristics at baseline for patients with versus without in-lab PSG and CSR classification (included versus excluded from the current analysis)

|                                      | Included patients |                | Excluded patients |                | Total      |                |
|--------------------------------------|-------------------|----------------|-------------------|----------------|------------|----------------|
|                                      | Values            | Missing, n (%) | Values            | Missing, n (%) | Values     | Missing, n (%) |
| N (%)                                | 1557 (23)         |                | 5319 (77)         |                | 6876 (100) |                |
| Age, years                           | 68±10             | 0 (0)          | 66±12             | 0 (0)          | 67±11      | 0 (0)          |
| Female, n (%)                        | 204 (13)          | 0 (0)          | 1244 (23)         | 0 (0)          | 1448 (21)  | 0 (0)          |
| Body mass index, kg/m <sup>2</sup>   | 29±5              | 0 (0)          | 28±5              | 0 (0)          | 28±5       | 0 (0)          |
| LVEF, %                              | 34±8              | 0 (0)          | 33±8              | 0 (0)          | 33±8       | 0 (0)          |
| NYHA class III+IV                    | 1112 (71)         | 0 (0)          | 3795 (71)         | 0 (0)          | 4907 (71)  | 0 (0)          |
| Ischemic cardiomyopathy, n (%)       | 848 (54)          | 0 (0)          | 2855 (54)         | 0 (0)          | 3703 (54)  | 0 (0)          |
| Atrial fibrillation, n (%)           | 480 (31)          | 0 (0)          | 1384 (26)         | 0 (0)          | 1864 (27)  | 0 (0)          |
| <b>Medication, n (%)</b>             |                   |                |                   |                |            |                |
| ACE inhibitors and/or ARBs           | 1397 (90)         | 0 (0)          | 4684 (88)         | 0 (0)          | 6081 (88)  | 0 (0)          |
| β-blockers                           | 1398 (90)         | 0 (0)          | 4710 (89)         | 0 (0)          | 6108 (89)  | 0 (0)          |
| Diuretics                            | 1266 (81)         | 0 (0)          | 4156 (78)         | 0 (0)          | 5422 (79)  | 0 (0)          |
| Digitalis                            | 291 (19)          | 0 (0)          | 1025 (19)         | 0 (0)          | 1316 (19)  | 0 (0)          |
| Aldosterone antagonists              | 714 (46)          | 0 (0)          | 2548 (48)         | 0 (0)          | 3262 (47)  | 0 (0)          |
| <b>Polysomnography</b>               |                   |                |                   |                |            |                |
| AHI, /h                              | 37±17             | 0 (0)          | 17±17             | 4495 (85)      | 30±19      | 4495 (65)      |
| cAHI, /h                             | 19±16             | 0 (0)          | 7±12              | 4509 (85)      | 15±16      | 4509 (66)      |
| AI, /h                               | 21±17             | 0 (0)          | 9±13              | 4495 (85)      | 17±17      | 4495 (65)      |
| %cAHI/AHI                            | 52±35             | 0 (0)          | 37±36             | 4518 (85)      | 47±36      | 4481 (66)      |
| Mean SaO <sub>2</sub> , %            | 93±3              | 1 (0)          | 93±2              | 4497 (85)      | 93±3       | 4498 (65)      |
| Minimum SaO <sub>2</sub> , %         | 80±8              | 1 (0)          | 83±7              | 4498 (85)      | 81±8       | 4499 (65)      |
| Time with SaO <sub>2</sub> <90%, min | 54±72             | 12 (1)         | 34±66             | 4500 (85)      | 47±71      | 4512 (66)      |
| Awake pCO <sub>2</sub> , mmHg        | 38±5              | 0 (0)          | 38±4              | 4804 (90)      | 38±5       | 4804 (70)      |

Values are mean  $\pm$  standard deviation, or number of patients (percentage).

ACE indicates angiotensin converting enzyme; AHI, apnea-hypopnea-index; AI, apnea index; ARB, angiotensin receptor blocker; cAHI, central AHI; CSA, central sleep apnea (defined as %cAHI/AHI  $\geq$ 80.0%); LVEF, left ventricular ejection fraction; NYHA, New York Heart Association; OSA, obstructive sleep apnea (defined as %cAHI/AHI 0-19.9%); OSA-CSA, obstructive sleep apnea + central sleep apnea (defined as %cAHI/AHI  $\geq$ 20.0% and <80%); pCO<sub>2</sub>, partial pressure of carbon dioxide; SaO<sub>2</sub>, oxygen saturation.

## Appendix

### SchlaHF investigators (all from Germany)

| Site                                                         | Investigator(s)                 | City       |
|--------------------------------------------------------------|---------------------------------|------------|
| Ambulantes Cardiovasculäres<br>Centrum Ravensburg            | Dr. K Schlotterbeck             | Ravensburg |
| Ambulantes Herzzentrum<br>Kassel                             | Dr. A Utech                     | Kassel     |
| Ärztezentrum Holthausen-<br>Biene                            | Dr. L Stauff                    | Lingen     |
| Asklepios Klinik Barmbek                                     | Dr. G Grönefeld, Prof. H Becker | Hamburg    |
| Augusta Krankenanstalten<br>Bochum                           | Dr. W Lucanus                   | Bochum     |
| Augusta-Kranken-Anstalt<br>gGmbH Thoraxzentrum<br>Ruhrgebiet | Dr. M Neddermann                | Herne      |
| Cardio-Praxis Herne Dr. Furche                               | Dr. K-G Furche                  | Herne      |
| Cardiopraxis Ingelheim                                       | Dr. M Speth-Nitschke            | Ingelheim  |
| Charité Campus Mitte                                         | Prof. G Baumann                 | Berlin     |
| Charité Campus Mitte CCM                                     | Prof. I Fietze                  | Berlin     |
| Charité Campus Virchow-<br>Klinikum                          | Dr. H-D Düngen                  | Berlin     |
| Charité Campus Virchow-<br>Klinikum II                       | Dr. M Rauchhaus                 | Berlin     |

| <b>Site</b>                                                                          | <b>Investigator(s)</b>              | <b>City</b>         |
|--------------------------------------------------------------------------------------|-------------------------------------|---------------------|
| Deutsches Zentrum für<br>Herzinsuffizienz, CHFC,<br>Universitätsklinikum<br>Würzburg | Prof. C Angermann                   | Würzburg            |
| DRK Krankenhaus                                                                      | Dr. O Laakmann                      | Alzey               |
| DRK Krankenhaus Mölln-<br>Ratzeburg                                                  | Dr. S Kuster                        | Ratzeburg           |
| Elisabeth-Krankenhaus Essen                                                          | Prof. GV Sabin                      | Essen               |
| Evangelische Lungenfachklinik<br>Buch                                                | Prof. C Grohe                       | Berlin              |
| Evangelisches Krankenhaus                                                            | Prof. E Vester                      | Düsseldorf          |
| Evangelisches Krankenhaus<br>Mülheim                                                 | Dr. P Kekes                         | Mülheim an der Ruhr |
| Facharztzentrum Dresden-<br>Neustadt GbR                                             | Dr. B Krosse                        | Dresden             |
| Facharztzentrum Sonneberg                                                            | Dr. C Franke                        | Sonneberg           |
| Fachkliniken Wangen                                                                  | Dr. H Knappe                        | Wangen              |
| Fachkrankenhaus Coswig                                                               | Prof. G Höffken                     | Coswig              |
| Florence Nightingale<br>Krankenhaus                                                  | Dr. U Heidland,<br>Dr. M Neddermann | Düsseldorf          |
| Gemeinschaftspraxis Weiß/Dr.<br>Heesing                                              | Dr. B Heesing                       | Arnsberg            |
| Gemeinschaftspraxis Dres<br>Böhmeke/Schmidt                                          | Dr. T Böhmeke                       | Gladbeck            |

| <b>Site</b>                                         | <b>Investigator(s)</b> | <b>City</b>    |
|-----------------------------------------------------|------------------------|----------------|
| Gemeinschaftspraxis Dres<br>Leischik/Littwitz       | Dr. R Leischik         | Hagen          |
| Gemeinschaftspraxis Dres.<br>Brandt/Jakobs          | Dr. C Jakobs           | Mannheim       |
| Gemeinschaftspraxis Dres.<br>Guckenbiehl            | Dr. M Guckenbiehl      | Flonheim       |
| Gemeinschaftspraxis Dres.<br>Gysan/Heinzler/May     | Dr. E May              | Köln           |
| Gemeinschaftspraxis Dres.<br>Heifer/Loster/Schernus | Dr. U Loster           | Mannheim       |
| Gemeinschaftspraxis Dres.<br>Schmidt/Gronke         | Dr. K Gronke           | Dresden        |
| Gemeinschaftspraxis Dres.<br>Subin/Lutter           | Dr. B Subin            | Hamburg        |
| Gemeinschaftspraxis Dres.<br>Wauer/ Windstetter     | Dr. B Wauer            | München        |
| Gemeinschaftspraxis Groß-<br>Ziethener Chaussee     | Dr. K Laskos           | Berlin         |
| Gemeinschaftspraxis<br>Kardiologie                  | Dr. G Kerkhoff         | Bottrop        |
| Gemeinschaftspraxis<br>Kardiologie Dr. Becker       | Dr. E Becker           | Castrop-Rauxel |
| Gemeinschaftspraxis PD<br>Dr. Lankisch              | Prof. M Lankisch       | Düsseldorf     |
| Helios Klinik Lengerich                             | Dr. M Hilgedieck       | Lengerich      |



| <b>Site</b>                                       | <b>Investigator(s)</b> | <b>City</b>    |
|---------------------------------------------------|------------------------|----------------|
| Helios Klinikum Borna                             | Dr. U Müller           | Borna          |
| HELIOS Klinikum Erfurt                            | B Mross                | Erfurt         |
| HELIOS Klinikum Krefeld                           | Dr. M Streuter         | Krefeld        |
| HELIOS Krankenhaus Leisnig                        | Dr. W Krahwinkel       | Leisnig        |
| Herz- und Diabeteszentrum<br>NRW                  | Dr. O Oldenburg        | Bad Oeynhausen |
| Herzklinik Ulm Dr. Haerer und<br>Partner          | Dr. W Haerer           | Ulm            |
| Herzzentrum Bad Krozingen                         | Dr. W Zeh              | Bad Krozingen  |
| Herzzentrum Brandenburg                           | Dr. C Butter           | Bernau         |
| Herzzentrum Universität<br>Dresden                | Prof. R Strasser       | Dresden        |
| Jüdisches Krankenhaus Berlin                      | Prof. K Graf           | Berlin         |
| Kardiologie am Rotkreuzplatz                      | Dr. KS Liem            | München        |
| Kardiologie Brühl                                 | Dr. J Pütz             | Brühl          |
| Kardiologie<br>Gemeinschaftspraxis<br>Dr. Tenholt | Dr. M Tenholt          | Bochum         |
| Kardiologie Kemnade                               | Dr. C Seifert          | Bochum         |
| Kardiologie Oberkassel                            | Dr. F Hauer            | Düsseldorf     |
| Kardiologie Praxis<br>Dr. Bonnekamp               | Dr. Bonnekamp          | Essen          |
| Kardiologische Praxis Dr. Arens                   | Dr. R Arens            | Hagen          |

---

| <b>Site</b>                                 | <b>Investigator(s)</b> | <b>City</b>    |
|---------------------------------------------|------------------------|----------------|
| Kardiologische Praxis<br>Dr. Birkenhagen    | Dr A Birkenhagen       | Stollberg      |
| Kardiologische Praxis<br>Dr. Burkhard-Meier | Dr. C Burkhard-Meier   | Viersen        |
| Kardiologische Praxis<br>Dr. Cierpka        | Dr. R Cierpka          | Hannover       |
| Kardiologische Praxis Dr. Cord<br>Müller    | Dr. C Müller           | Essen          |
| Kardiologische Praxis<br>Dr. Figura         | Dr. T Figura           | Rinteln        |
| Kardiologische Praxis<br>Dr. Golling        | Dr. FR Golling         | Dortmund       |
| Kardiologische Praxis<br>Dr. Gumbrecht      | Dr. H Gumbrecht        | Ochtrup        |
| Kardiologische Praxis<br>Dr. Horowitz       | Dr. A Horowitz         | Düsseldorf     |
| Kardiologische Praxis Dr. Hötte             | Dr. R Hötte            | Hannover       |
| Kardiologische Praxis Dr. Hug               | Dr. J Hug              | Günzburg       |
| Kardiologische Praxis<br>Dr. Isbruch        | Dr. F Isbruch          | Castrop-Rauxel |
| Kardiologische Praxis<br>Dr. Krater         | Dr. L Krater           | Krefeld        |
| Kardiologische Praxis<br>Dr. Lodde          | Dr. BP Lodde           | Dortmund       |

---

| <b>Site</b>                                        | <b>Investigator(s)</b> | <b>City</b>       |
|----------------------------------------------------|------------------------|-------------------|
| Kardiologische Praxis Dr. Raff                     | Dr. F Raff             | Düsseldorf        |
| Kardiologische Praxis<br>Dr. Rudolf/ Dr. Bernhardt | Dr. HJ Rudolph         | Worms             |
| Kardiologische Praxis<br>Dr. Schlichting           | Dr. J Schlichting      | Herne             |
| Kardiologische Praxis<br>Dr. Schön                 | Dr. N Schön            | Mühdorf           |
| Kardiologische Praxis<br>Dr. Staubach              | Dr. P Staubach         | Bochum            |
| Kardiologische Praxis<br>Dr. Vrettos               | Dr. Z Vrettos          | Witten            |
| Kardiologische Praxis<br>Dr. Wetzel                | Dr. T Wetzel           | Dortmund          |
| Kardiologische Praxis<br>Dr. Wiethölter            | Dr. K Wiethölter       | Radebeul          |
| Kardiologische Praxis<br>Gütersloh                 | Dr. T Seifert          | Gütersloh         |
| Kardiologische Praxis<br>Marschner                 | J Marschner            | Bonn              |
| Kardiologische Praxis Nienburg                     | Dr. N Proskynitopoulos | Nienburg          |
| Kardiopraxis Rheinberg                             | G Weyers               | Bergisch Gladbach |
| Kath. Kliniken<br>Essen/Philippusstift             | Prof. B Hailer         | Essen             |
| Klinik Augustinum München                          | Prof. M Block          | München           |

| <b>Site</b>                          | <b>Investigator(s)</b> | <b>City</b>         |
|--------------------------------------|------------------------|---------------------|
| Klinik Lazariterhof                  | Prof. G Bönner         | Bad Krozingen       |
| Klinikum Coburg GmbH                 | Dr. AM Sinha           | Coburg              |
| Klinikum Dahme-Spreewald GmbH        | Dr. P Waurick          | Königs Wusterhausen |
| Klinikum der Universität Köln        | Dr. H Reuter           | Köln                |
| Klinikum der Universität zu Köln     | Dr. H Reuter           | Köln                |
| Klinikum Hannover Oststadt-Heidehaus | Prof. B Schönhofer     | Hannover            |
| Krankenhaus Bethanien                | Prof. S Möhlenkamp     | Moers               |
| Krankenhaus Bethanien Moers          | Dr. T Voshaar          | Moers               |
| Krankenhaus Reinbek St. Adolf-Stift  | Dr. A Aydin            | Reinbek             |
| Kreiskrankenhaus Stollberg GmbH      | Dr. L Griesbach        | Stollberg           |
| Lukaskrankenhaus GmbH                | Prof. M Haude          | Neuss               |
| Lungenärzte am Rotkreuzplatz         | Dr. K Storck           | München             |
| Lungenfachklinik Immenhausen         | Prof. S Andreas        | Immenhausen         |
| Lungenklinik Hemer                   | Dr. M Westhoff         | Hemer               |
| Malteser Krankenhaus St. Hildegardis | Prof. M von Eiff       | Köln                |
| MECS Cottbus GmbH                    | Dr F Käßner            | Cottbus             |

| <b>Site</b>                          | <b>Investigator(s)</b> | <b>City</b>                   |
|--------------------------------------|------------------------|-------------------------------|
| Mediclin Rehasentrum<br>Spreewald    | Dr. W Kamke            | Burg/ Spreewald               |
| Missionsärztliche Klinik<br>Würzburg | Prof. B Janey          | Würzburg                      |
| MVZ am Küchwald                      | Dr. W Dänschel         | Chemnitz                      |
| POLIKUM Friedenau                    | Dr. MO Grad            | Berlin                        |
| Praxis Dr. Anselm Bäumer             | Dr. A Bäumer           | Köln                          |
| Praxis Dr. Ebeling                   | Dr. O Ebeling          | Schönefeld/ OT<br>Waltersdorf |
| Praxis Dr. Frieske                   | Dr. R Frieske          | Aachen                        |
| Praxis Dr. Fröhlich                  | Dr. T Fröhlich         | Ratingen                      |
| Praxis Dr. Gerritsen                 | Dr. R Gerritsen        | Waldkraiburg                  |
| Praxis Dr. Hein                      | Dr. H Hein             | Reinbek                       |
| Praxis Dr. Hohensee                  | Dr. H Hohensee         | Dresden                       |
| Praxis Dr. Kestermann                | Dr. O Kestermann       | Rheine                        |
| Praxis Dr. Nebel                     | Dr. W Nebel            | Rheine                        |
| Praxis Dr. Rau                       | Dr. T Rau              | Essen                         |
| Praxis Dr. Schnabel                  | Dr. A Schnabel         | Meißen                        |
| Praxis Dr. Stratmann                 | Dr. M Stratmann        | Dortmund                      |
| Praxis Dr. Tekiyeh                   | Dr. M Tekiyeh          | Essen                         |
| Praxis Dres. Böhme/Linke             | Dr. M Linke            | München                       |

| <b>Site</b>                                           | <b>Investigator(s)</b> | <b>City</b>   |
|-------------------------------------------------------|------------------------|---------------|
| Praxis für Kardiologie Dr. med.<br>Hewing             | Dr. R Hewing           | Münster       |
| Praxis für Kardiologie Dr. med.<br>Menz               | Dr. V Menz             | Menden        |
| Praxis für Kardiologie Ratingen                       | Dr. KF Schmitz         | Ratingen      |
| Praxis für Lunge, Herz und<br>Schlaf                  | Dr. H Storm            | Bielefeld     |
| Praxis Westend                                        | Dr. U Kühne            | Berlin        |
| Prof. Franzen Institut - Apel                         | Dr. C Apel             | Köln          |
| Prof. Franzen Institut                                | Prof. D Franzen        | Köln          |
| Ruhrlandklinik Essen                                  | Prof. H Teschler       | Essen         |
| Schlaflabor Breisgau                                  | Dr. W Randelshofer     | Bad Krozingen |
| Schwerpunktpraxis Kardiologie<br>Drs. Ophoff/Fritzsch | Dr. N Ophoff           | Essen         |
| Siloah Krankenhaus                                    | Prof. A Franke         | Hannover      |
| St. Elisabeth-Hospital Herten<br>gGmbH                | Dr. H Neubauer         | Herten        |
| St.-Josephs-Hospital                                  | Dr. J Börgel           | Bochum        |
| St.-Vinzenz Hospital                                  | Dr. S Winter           | Köln-Nippes   |
| Stiftungsklinik Weißenhorn                            | Dr. M Miller           | Weißenhorn    |
| Studiengesellschaft IFAZ GbR                          | Dr. K Jocham           | Memmingen     |
| Thoraxklinik Heidelberg<br>gGmbH                      | Dr. A Benz             | Heidelberg    |

| <b>Site</b>                                                 | <b>Investigator(s)</b>            | <b>City</b> |
|-------------------------------------------------------------|-----------------------------------|-------------|
| Unfallkrankenhaus Berlin                                    | Dr. L Bruch                       | Berlin      |
| Universität Leipzig -<br>Herzzentrum                        | Dr. M Sandri                      | Leipzig     |
| Universitätsklinik<br>Bergmannsheil                         | Dr. HW Duchna                     | Bochum      |
| Universitätsklinik Mannheim                                 | Prof. T Kälsch                    | Mannheim    |
| Universitätsklinikum Aachen                                 | Dr. A Schuch                      | Aachen      |
| Universitätsklinikum Bonn                                   | Dr. D Skowasch, Dr. R Andrié      | Bonn        |
| Universitätsklinikum Essen                                  | Prof. T Neumann                   | Essen       |
| Universitätsklinikum Freiburg                               | Prof. S Sorichter, Prof. A Zirlik | Freiburg    |
| Universitätsklinikum<br>Gießen/Marburg Standort<br>Marburg  | Prof. P Alter                     | Marburg     |
| Universitätsklinikum<br>Gießen/Marburg, Standort<br>Marburg | Prof. U Koehler                   | Marburg     |
| Universitätsklinikum<br>Hamburg-Eppendorf                   | Dr. C Sinning                     | Hamburg     |
| Universitätsklinikum<br>Heidelberg                          | Dr. L Frankenstein                | Heidelberg  |
| Universitätsklinikum<br>Mannheim                            | Dr. J Maurer                      | Mannheim    |
| Universitätsklinikum<br>Münster/WWU                         | Prof. P Young, Dr. J Stypmann     | Münster     |

---

| <b>Site</b>                                                  | <b>Investigator(s)</b> | <b>City</b> |
|--------------------------------------------------------------|------------------------|-------------|
| Universitätsklinikum<br>Regensburg                           | Prof. M Arzt           | Regensburg  |
| Universitätsklinikum<br>Schleswig-Holstein Campus<br>Lübeck  | Dr. A Steffen          | Lübeck      |
| Universitätsklinikum<br>Schleswig-Holstein, Campus<br>Lübeck | Dr. F Bode             | Lübeck      |

---
